# Supplementary material for: Rapid Formation of Kinetically Sprayed Cu-Sn Intermetallic Film
Source: Hindawi journal article supplement (doi:10.1155/2019/4575079), 2019-10-21
Supplement: f1 [file 4575079.f1.docx]

**Rapid formation of kinetically sprayed Cu-Sn intermetallic film**

Dahyun Choi1, Suhee Kang1, Hyungsub Kim2, Hyojun Kim1 and Caroline Sunyong Lee1,*

1. Department of Materials and Chemical Engineering, Hanyang University, Ansan-si, Gyeonggi-do, 15588, Republic of Korea
2. Nanobiomagnetics and Bioelectronics Laboratory (NB2L), Department of Electrical Engineering, University of South Carolina, Swearingen, Room 3A31, 301 Main Street Columbia, SC 29208, USA

(* E-mail: sunyonglee@hanyang.ac.kr)


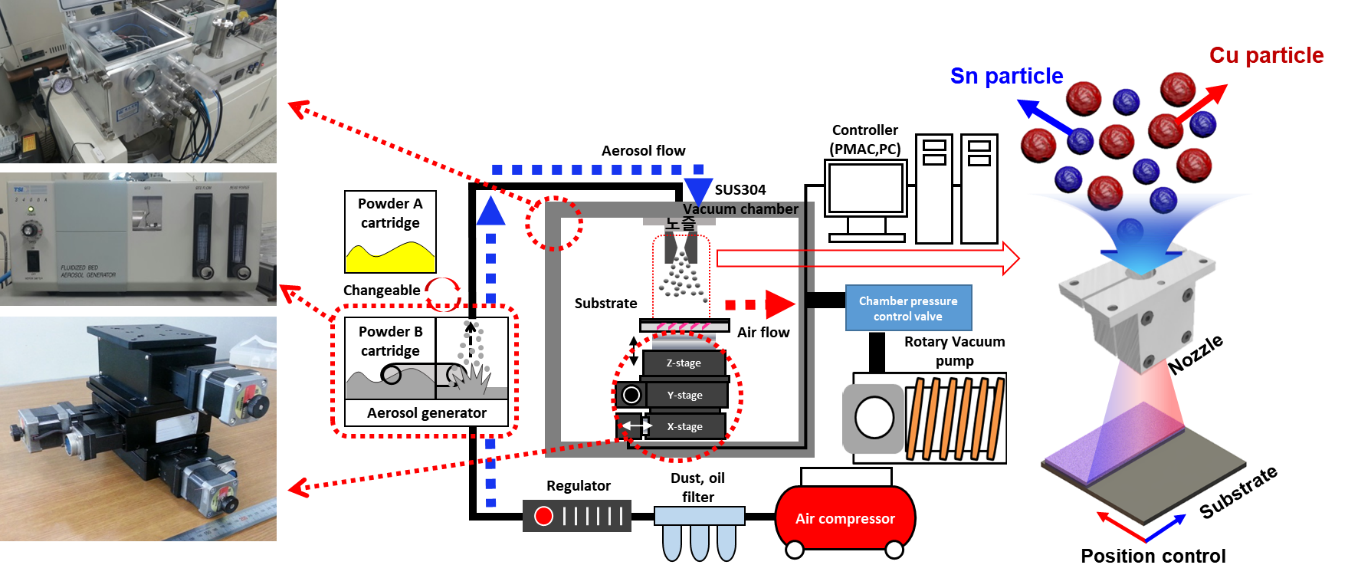


Figure S1. The schematic of Kinetically sprayed system

Kinetically sprayed system is a novel method to deposit ceramic and metallic powders on a substrate at room temperature by accelerating particles to subsonic speed. As shown in Figure S1, kinetically sprayed system is composed of the air compressor with aerosol generator which blows the air to float various sized particles from nano to micro-sized. The floated particles are accelerated to subsonic or supersonic speed through the macro nozzle in low vacuum chamber. Finally, the powder is deposited on the substrate with maximum velocity at a distance which is defined as Stand-off Distance (SoD) between the nozzle and the substrate [1-4].

1. D.-M. Chun, C.-S. Kim, J.-O. Choi, G.-Y. Lee, C. S. Lee and S.-H. Ahn, "Multilayer deposition of ceramic and metal at room temperature using nanoparticle deposition system (NPDS) and planarization process," *The International Journal of Advanced Manufacturing Technology*, vol. 72, no. 1, pp. 41-46, 2014.

2. M. N. E. A. A. Nasim and D.-M. Chun, "Formation of few-layer graphene flake structures from graphite particles during thin film coating using dry spray deposition method," *Thin Solid Films*, vol. 622, pp. 34-40, 2017.

3. K.-S. Kim, J. Lee, Y. H. Kim and C. S. Lee, "Effect of Scanning Speed on Copper Line Deposition Using Nanoparticle Deposition System (NPDS) for Direct Printing Technology," *Aerosol Science and Technology*, vol. 47, no. 1, pp. 106-113, 2013.

4. Y. Park, H. Kim, G.-Y. Lee, R. C. Pawar, J.-S. Lee and C. S. Lee, "Photocatalytic evaluation of self-assembled porous network structure of ferric oxide film fabricated by dry deposition process," *Materials Chemistry and Physics*, vol. 181, pp. 241-247, 2016.
